# Supplementary material for: NiFe-MIL-derived Si@C nanoparticles decorated on graphene sheets for efficient lithium storage
Source: Royal Society of Chemistry journal article supplement (doi:10.1039/d4nj05228e), 2025-01-01
Supplement: d4nj05228e1.pdf [file d4nj05228e1.pdf]

## Supplementary Information

### **NiFe-MIL-derived Si@C nanoparticles decorated on graphene sheets for efficient lithium storage**

Jie Huang, Yanlin Zhang, Junhong Lu, Haoyang Jiang, Ben Liang, Benyuan Wang, Dafang He\*, and Haiqun Chen\*

Key Laboratory of Advanced Catalytic Materials and Technology, Advanced Catalysis and Green Manufacturing Collaborative Innovation Center, Changzhou University, Changzhou 213164, Jiangsu Province, China.

**\*Corresponding Author:**

E-mail: dafanghe@cczu.edu.cn; chenhq@cczu.edu.cn

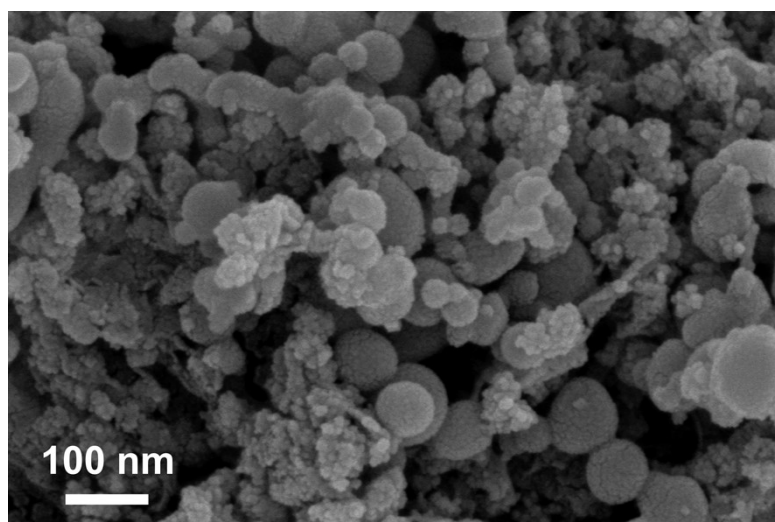

**Fig. S1** SEM image of Si@NiFe-MIL@GO before carbonization.

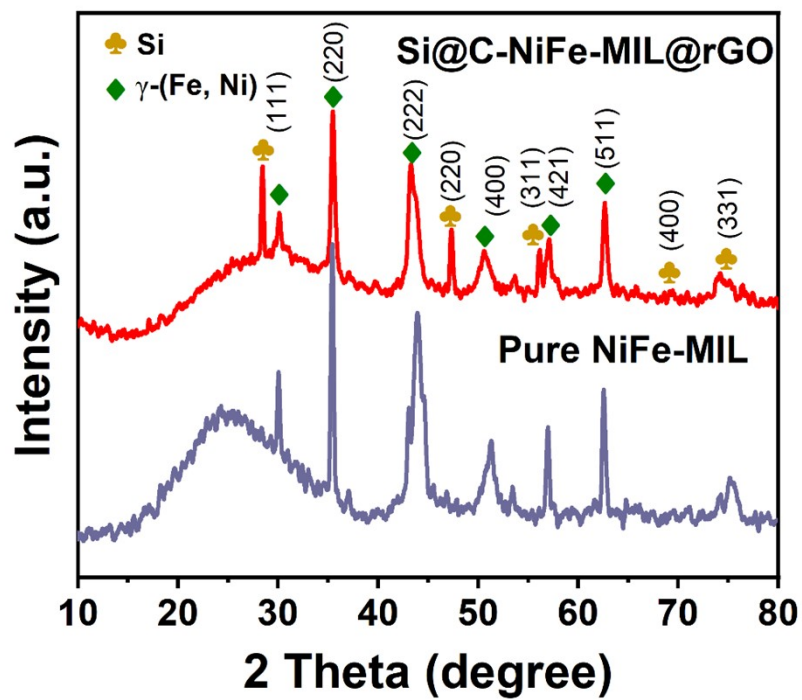

**Fig. S2** XRD patterns of the Si@C-NiFe-MIL@rGO and NiFe-MIL composite.

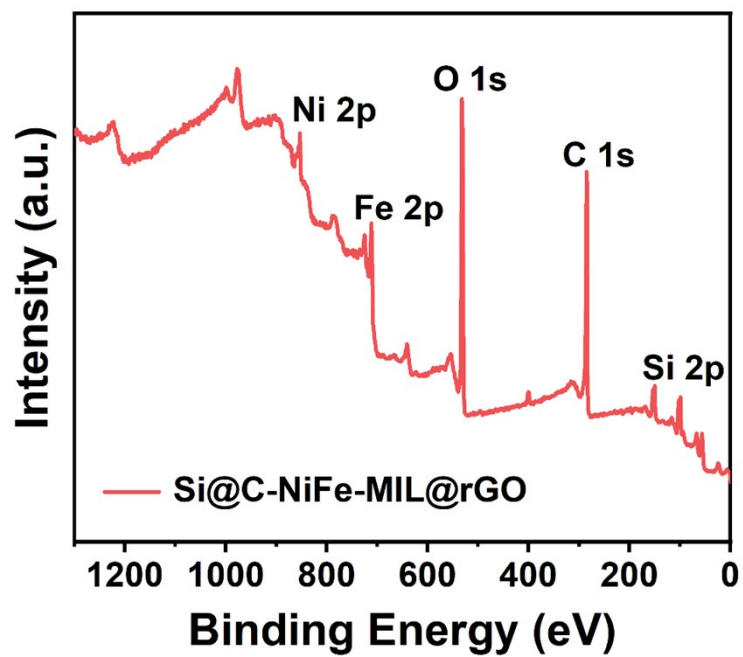

**Fig. S3** XPS survey spectra of the Si@C-NiFe-MIL@rGO composite.

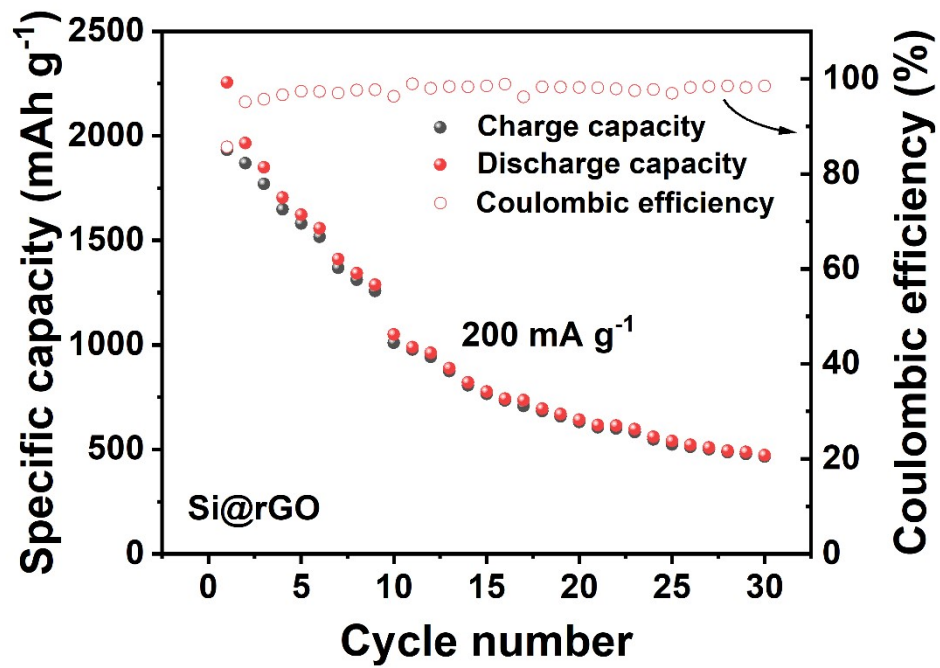

**Fig. S4** The cycling performance of the Si@rGO electrode at a current density of 200 mA g<sup>-1</sup>.

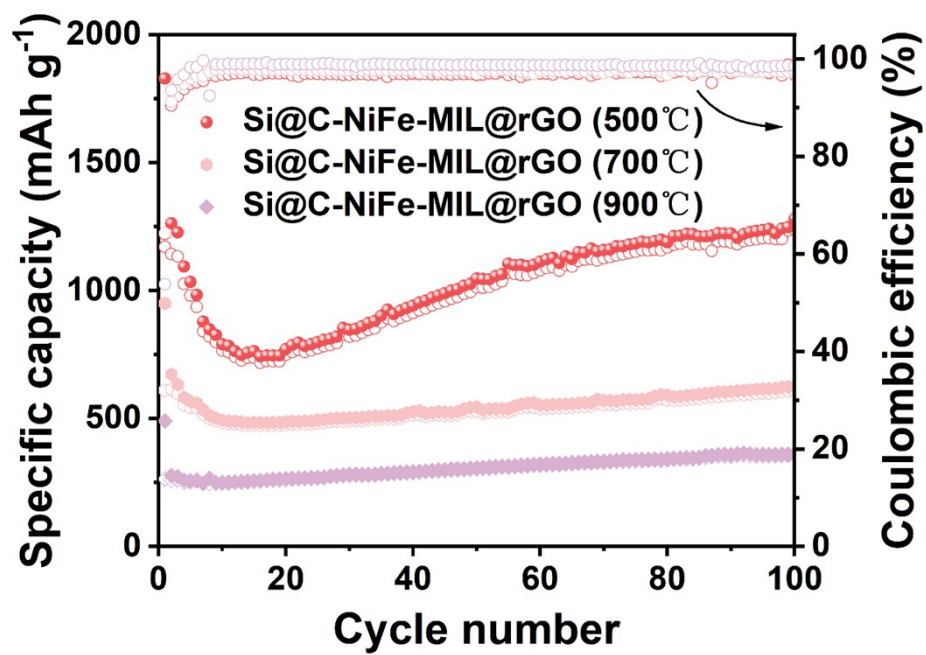

**Fig. S5** The cycling performance of the Si@C-NiFe-MIL@rGO electrode under different carbonization temperatures at a current density of 200 mA g<sup>-1</sup>.

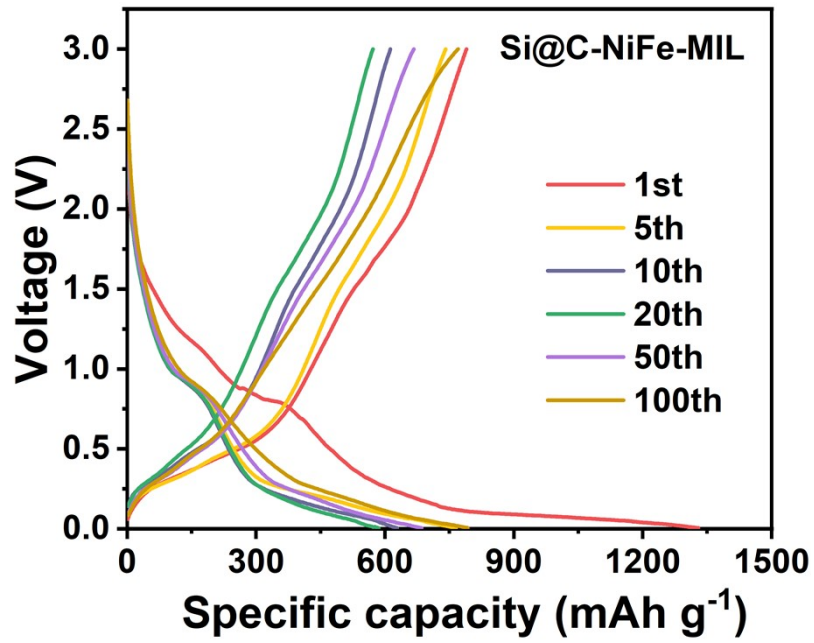

**Fig. S6** Corresponding capacity-voltage curves of the Si@C-NiFe-MIL electrode at various cycles at 200 mA g<sup>-1</sup>.

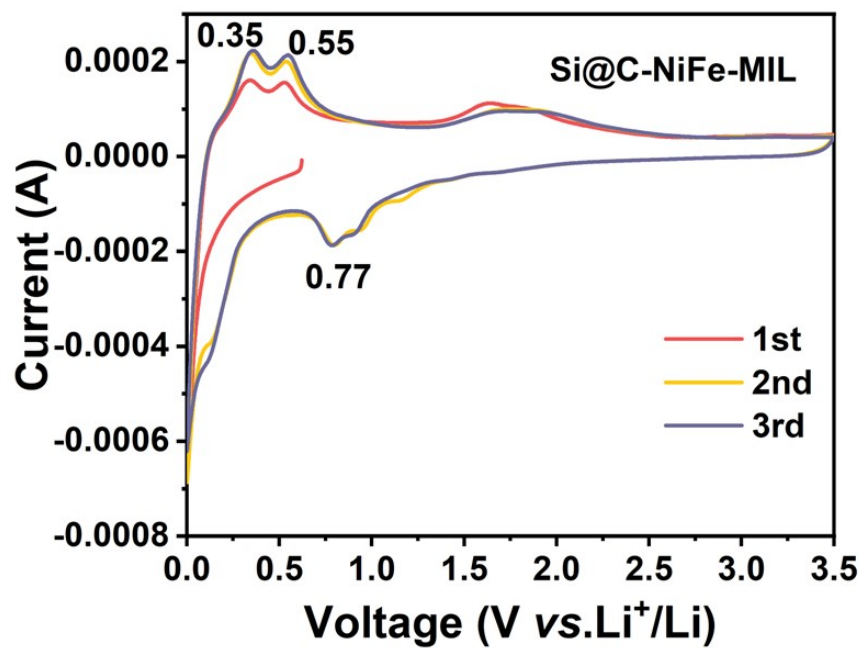

**Fig. S7** The initial three CV curves of the Si@C-NiFe-MIL electrode, scanned at a rate of 0.1 mV s<sup>-1</sup> from 0.01 to 3.0 V.



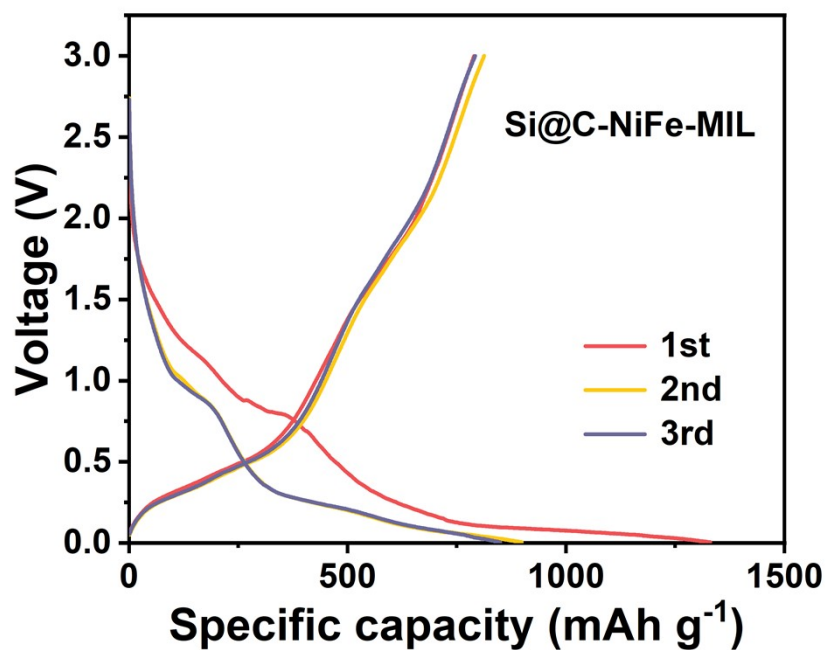

**Fig. S8** Charge/discharge profiles of the Si@C-NiFe-MIL electrode at initial three cycles at 200 mA g<sup>-1</sup>.

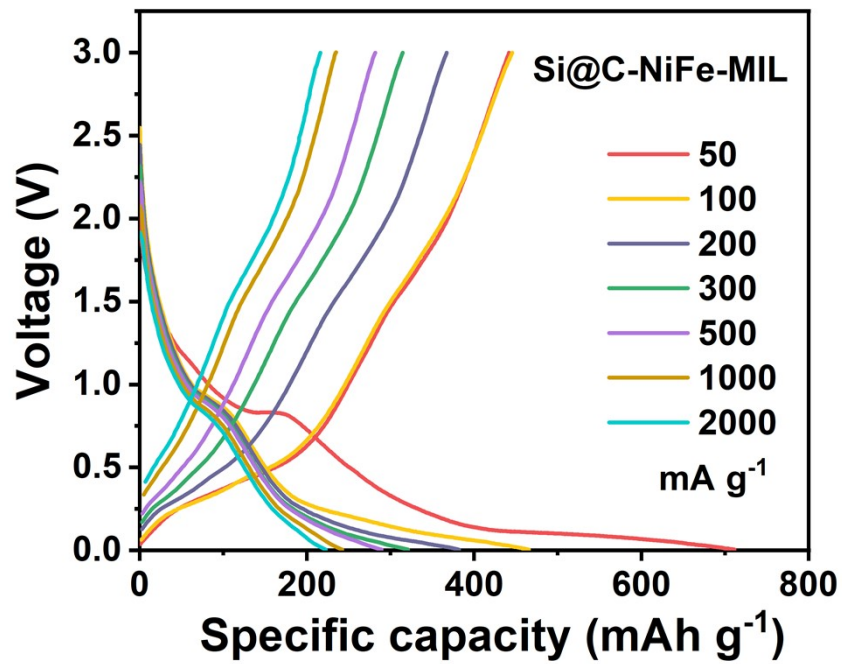

**Fig. S9** Corresponding capacity-voltage curves of the Si@C-NiFe-MIL electrode at different current densities.

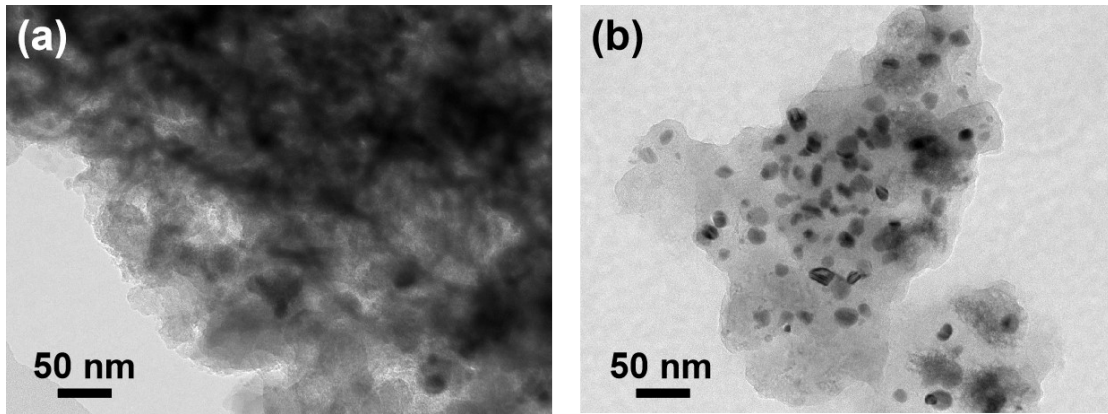

**Fig. S10** TEM of (a) Si@C-NiFe-MIL@rGO and (b) Si@C-NiFe-MIL electrode after 50 cycles.

**Table S1.** Element contents measured by EDS for Si@C-NiFe-MIL@rGO composite.

| <b>Si@C-NiFe-MIL@rGO</b> | <b>C</b> | <b>O</b> | <b>Si</b> | <b>Ni</b> | <b>Fe</b> |
|--------------------------|----------|----------|-----------|-----------|-----------|
| <b>At %</b>              | 39.32    | 18.81    | 25.27     | 6.65      | 9.96      |
| <b>Wt %</b>              | 19.44    | 12.39    | 29.22     | 16.06     | 22.89     |
